# Supplementary material for: Associations between Delayed Introduction of Complementary Foods and Childhood Health Consequences in Exclusively Breastfed Children
Source: MDPI journal article supplement (doi:10.3390/nu15153410), 2023-07-31
Supplement: s1 [file s1]

**Supplementary Table S1.** Operating characteristics of diagnosis codes used to define primary outcome diseases of interest.

| Outcome <sup>a</sup>                      | Definition                                                                                                                                          | ICD-10 codes used in the study |
|-------------------------------------------|-----------------------------------------------------------------------------------------------------------------------------------------------------|--------------------------------|
| Pneumonia[1]                              | Inpatient visit with a pneumonia code                                                                                                               | J12; J 15; J18                 |
| Asthma [2]                                | Outpatient hospital visit with an asthma code of J45 (asthma), J46 (status asthmaticus) and ≥1 claim as an inpatient.                               | J45; J46                       |
| URTI [3]                                  | Inpatient visit with an acute upper respiratory infections code                                                                                     | J00-J03; J06                   |
| Acute gastroenteritis [4]                 | Inpatient visit with an intestinal infectious diseases code                                                                                         | A00-A09                        |
| Acute otitis media                        | Any hospital visit with an acute otitis media code with relevant procedure codes                                                                    | H65.X, H66.X, H67.X            |
| Tooth decay                               | Any hospital visit with decayed, missing, or filled teeth                                                                                           | K02.X                          |
| ADHD <sup>b</sup> [5]                     | Individuals who received a diagnosis of ADHD with at least two records of psychiatric outpatient visits within one year or one admission diagnosis. | F90                            |
| Autism spectrum disorder <sup>c</sup> [5] | Two or more in-/outpatient visit with autism spectrum disorder codes for at least 6 months interval                                                 | F84.0, F84.1, F84.9            |
| Epilepsy [5]                              | Inpatient visit with an epilepsy code or ≥ 2 hospital visits with an epilepsy code and two prescriptions of the same AED within six months.         | G40; G41                       |
| Malignancy                                | Any in-/outpatient visit with a neoplasm code                                                                                                       | C00-C97; D00-D48               |

Abbreviation: ADHD, Attention-Deficit/Hyperactivity Disorder; ICD-10, International Classification of Disease 10th Version; URTI, Upper Respiratory Tract Infection. <sup>a</sup> Subsequent clinical medical outcomes recorded after 24 months were investigated, unless otherwise stated. <sup>b</sup> Diagnosis recorded after 48 months of age in the national health insurance database was investigated. <sup>c</sup> Diagnosis recorded after 18 months of age in the national health insurance database was investigated.

**Supplementary Table S2.** Variables in the propensity score matching of the main cohort <sup>a</sup>.

| Characteristic                                         | Database            | Variables                                                                                                                                                                                                                                                      |
|--------------------------------------------------------|---------------------|----------------------------------------------------------------------------------------------------------------------------------------------------------------------------------------------------------------------------------------------------------------|
| Demographics                                           | NHIS                | Age, sex, income quintile, residence at birth                                                                                                                                                                                                                  |
|                                                        | NHSPIC <sup>b</sup> | Birth weight, types of feeding (breastmilk, formula, mixed, or special milk) during 4-6 months of life, whether introduced to solid food before 4 months of life, weight at 4-6 month, head circumference at 4-6 month, weight gain during the first 4-6months |
| Use of hospital resources                              | NHIS                | Visit to a pediatrician, visit to the Emergency Room (ER)                                                                                                                                                                                                      |
| Physical examinations                                  | NHSPIC <sup>b</sup> | General condition, head and fontanelle, face, eyes, nose, ears, oral cavity/neck, lungs, heart, abdomen, genitals, extremities, spine, nerves, and skin                                                                                                        |
| Supervision regarding child safety and sleeping habits | NHSPIC <sup>b</sup> | Parent answers to relevant questions                                                                                                                                                                                                                           |
| Comorbidities                                          |                     |                                                                                                                                                                                                                                                                |
| Health Care Use                                        | NHIS                | any hospitalization, ICU admission, death                                                                                                                                                                                                                      |
| Disease exposure before index date                     | NHIS (ICD-10 code)  |                                                                                                                                                                                                                                                                |
|                                                        | Z38.0               | Singleton, born in hospital                                                                                                                                                                                                                                    |
|                                                        | J00                 | Acute nasopharyngitis                                                                                                                                                                                                                                          |
|                                                        | J20.9               | Acute bronchitis                                                                                                                                                                                                                                               |
|                                                        | J06.9               | Acute upper respiratory infection, unspecified                                                                                                                                                                                                                 |
|                                                        | J21.9               | Acute bronchiolitis, unspecified                                                                                                                                                                                                                               |
|                                                        | P59.9               | Neonatal jaundice, unspecified                                                                                                                                                                                                                                 |
|                                                        | J02.9               | Acute pharyngitis, unspecified                                                                                                                                                                                                                                 |
|                                                        | L20.9               | Atopic dermatitis                                                                                                                                                                                                                                              |
|                                                        | A09.0               | Other and unspecified gastroenteritis and colitis of infectious origin                                                                                                                                                                                         |
|                                                        | A09.9               | Gastroenteritis and colitis of unspecified origin                                                                                                                                                                                                              |
|                                                        | R50.9               | Fever, unspecified                                                                                                                                                                                                                                             |
|                                                        | L22                 | Diaper dermatitis                                                                                                                                                                                                                                              |
|                                                        | L23.9               | Allergic contact dermatitis                                                                                                                                                                                                                                    |
|                                                        | J03.9               | Acute tonsillitis                                                                                                                                                                                                                                              |
|                                                        | J30.4               | Allergic rhinitis                                                                                                                                                                                                                                              |
|                                                        | L30.9               | Dermatitis                                                                                                                                                                                                                                                     |
|                                                        | H10.3               | acute conjunctivitis                                                                                                                                                                                                                                           |
|                                                        | K52.9               | Noninfective gastroenteritis and colitis, unspecified                                                                                                                                                                                                          |
|                                                        | H10.9               | Conjunctivitis, unspecified                                                                                                                                                                                                                                    |
|                                                        | P38                 | Omphalitis of newborn with or without mild haemorrhage                                                                                                                                                                                                         |
|                                                        | J18.9               | Pneumonia, unspecified                                                                                                                                                                                                                                         |
|                                                        | J45.9               | Other and unspecified asthma                                                                                                                                                                                                                                   |

|       |                                                                                                   |
|-------|---------------------------------------------------------------------------------------------------|
| H66.0 | Acute suppurative otitis media                                                                    |
| K59.0 | Constipation                                                                                      |
| J0.60 | Acute laryngopharyngitis                                                                          |
| A08.4 | Viral intestinal infection, unspecified                                                           |
| J03.9 | Acute tonsillitis, unspecified                                                                    |
| J06.8 | Other acute upper respiratory infections of multiple sites                                        |
| J01.9 | Acute sinusitis, unspecified                                                                      |
| H66.0 | Acute suppurative otitis media without spontaneous rupture of ear drum, unilateral or unspecified |
| N39.0 | Urinary tract infection, site not specified                                                       |
| L20.8 | Other atopic dermatitis                                                                           |
| K59.9 | Functional intestinal disorder, unspecified                                                       |
| H66.9 | Otitis media, unspecified, unilateral or unspecified                                              |
| J01.9 | Acute sinusitis, unspecified, not specified as recurrent                                          |
| L24.9 | Irritant contact dermatitis, unspecified cause                                                    |
| P39.1 | Neonatal conjunctivitis and dacryocystitis                                                        |
| B37.0 | Candidal stomatitis                                                                               |
| L21.1 | Seborrhoeic infantile dermatitis                                                                  |
| J30.3 | Other allergic rhinitis                                                                           |
| K21.9 | Gastro-oesophageal reflux disease without oesophagitis                                            |
| J22.0 | Unspecified acute lower respiratory infection                                                     |
| L219  | Seborrhoeic dermatitis, unspecified                                                               |
| K30   | Functional dyspepsia                                                                              |
| L50.9 | Urticaria, unspecified                                                                            |
| R11   | Nausea and vomiting                                                                               |
| J04.0 | Acute laryngitis                                                                                  |
| J18.0 | Bronchopneumonia, unspecified                                                                     |
| K59.1 | Functional diarrhea                                                                               |

Abbreviations: National Health Insurance Service, NHIS; National Health Screening Program for Infants and Children, NHSPIC. <sup>a</sup> Assessed from the date of birth to the index date, unless otherwise specified. <sup>b</sup> Obtained by the NHSPIC results performed at the first 4-6 months.

**Supplement Table S3.** Anthropometric measures and hospital visits compared by groups (4-<7 months *vs* ≥7 months)<sup>a</sup>.

| Measures, mean (SD) <sup>b</sup>             | Observed Data (N=206,248)  |                    |                       | Weighted Data (N =199,952) <sup>c</sup> |                    |                     |
|----------------------------------------------|----------------------------|--------------------|-----------------------|-----------------------------------------|--------------------|---------------------|
|                                              | Non-exposed<br>(n=165,925) | Exposed (n=40,323) | SMD,%<br><sup>d</sup> | Non-exposed (n=160,897)                 | Exposed (n=39,055) | SMD, % <sup>d</sup> |
| Birth weight, kg                             | 3.23 (0.32)                | 3.23 (0.32)        | 2                     | 3.23 (0.32)                             | 3.23 (0.32)        | 0                   |
| Weight at 4-6 month <sup>d</sup>             | 8.00 (0.95)                | 8.09 (1.00)        | 10                    | 8.02 (0.96)                             | 8.02 (0.96)        | 0                   |
| Head circumference at 4-6 month <sup>d</sup> | 42.57 (1.44)               | 42.63 (1.44)       | 4                     | 42.58 (1.43)                            | 42.58 (1.44)       | 0                   |
| Weight gain <sup>e</sup>                     | 4.77 (0.90)                | 4.86 (0.92)        | 10                    | 4.79 (0.9)                              | 4.79 (0.9)         | 0                   |
| Visit to a pediatrician                      | 7.53 (6.07)                | 7.64 (6.23)        | 2                     | 7.55 (6.09)                             | 7.55 (6.14)        | 0                   |
| Visit to the Emergency Room <sup>f</sup>     | 10,734 (6.47)              | 2,626 (6.51)       | 0                     | 10,583 (6.58)                           | 2,569 (6.58)       | 0                   |

Abbreviations: SD, Standard deviation; SMD, Standardized mean difference. <sup>a</sup> Assessed from the date of birth to the index date, unless otherwise specified. <sup>b</sup> Values are reported as mean (SD) unless otherwise indicated. <sup>c</sup> Inverse probability of treatment weighting on the propensity score was used to balance comparison groups on baseline health. Covariates for weighting were selected *a priori* (Table 1, Supplementary Table 3-6). Individuals of the reference group were weighted with stabilized weights, which allowed producing a sample with the same distribution of the covariates as the exposed group. <sup>d</sup> Performed at the first 4-6 months. <sup>e</sup> Calculated by subtracting the birth weight from the weight measured at the screening program round 1 (Weight measured between 4-6 months of age–birth weight). <sup>f</sup> Values are reported as number of participants (%).

**Supplementary Table S4.** Clinical characteristics of children compared by groups with different durations of exclusive breast milk feeding (4-<7 months *vs* ≥7 months)

<sup>a</sup>.

| Clinical characteristics, N (%)<br><sup>c</sup>                        | Observed Data (N=206,248) |                    |                      | Weighted Data (N =398,037) <sup>b</sup> |                    |                      |
|------------------------------------------------------------------------|---------------------------|--------------------|----------------------|-----------------------------------------|--------------------|----------------------|
|                                                                        | Non-exposed (n=165,925)   | Exposed (n=40,323) | SM D, % <sup>d</sup> | Non-exposed (n=160,897)                 | Exposed (n=39,055) | SM D, % <sup>d</sup> |
| Singleton, born in hospital                                            | 139,515 (84.08)           | 33,465 (82.99)     | 3                    | 168,479 (84.68)                         | 168,590 (84.69)    | 0                    |
| Acute nasopharyngitis                                                  | 67,827 (32.12)            | 16,300 (40.42)     | 1                    | 82,798 (41.61)                          | 82,931 (41.66)     | 0                    |
| Acute bronchitis                                                       | 53,299 (29.66)            | 13,581 (33.68)     | 4                    | 65,876 (33.11)                          | 65,858 (33.08)     | 0                    |
| Acute upper respiratory infection, unspecified                         | 49,214 (18.67)            | 11,854 (29.40)     | 4                    | 60,146 (30.23)                          | 60,184 (30.23)     | 0                    |
| Acute bronchiolitis, unspecified                                       | 30,975 (18.67)            | 8,007 (19.86)      | 3                    | 38,389 (19.29)                          | 38,442 (19.31)     | 0                    |
| Neonatal jaundice, unspecified                                         | 38,756 (23.36)            | 9,546 (23.67)      | 1                    | 47,511 (23.88)                          | 47,609 (23.92)     | 0                    |
| Acute pharyngitis, unspecified                                         | 29,393 (17.71)            | 7,045 (17.47)      | 1                    | 35,857 (18.02)                          | 35,821 (17.99)     | 0                    |
| Atopic dermatitis                                                      | 26,514 (15.98)            | 6,496 (16.11)      | 1                    | 32,096 (16.13)                          | 32,094 (16.12)     | 0                    |
| Other and unspecified gastroenteritis and colitis of infectious origin | 15,100 (9.10)             | 3,497 (8.67)       | 2                    | 18,350 (9.22)                           | 18,411 (9.25)      | 0                    |
| Gastroenteritis and colitis of unspecified origin                      | 13,899 (8.38)             | 3,191 (7.91)       | 2                    | 16,823 (8.46)                           | 16,837 (8.46)      | 0                    |
| Fever, unspecified                                                     | 11,180 (6.74)             | 2,708 (6.72)       | 0                    | 13,666 (6.87)                           | 13,718 (6.89)      | 0                    |
| Diaper dermatitis                                                      | 15,285 (9.21)             | 3,557 (8.82)       | 1                    | 18,471 (9.28)                           | 18,543 (9.31)      | 0                    |
| Allergic contact dermatitis                                            | 13,230 (7.97)             | 3,072 (7.62)       | 1                    | 15,893 (7.99)                           | 15,891 (7.98)      | 0                    |
| Acute tonsillitis                                                      | 7,318 (4.41)              | 1,859 (4.61)       | 1                    | 8,956 (4.50)                            | 8,936 (4.49)       | 0                    |
| Allergic rhinitis                                                      | 8,684 (5.23)              | 2,172 (5.39)       | 1                    | 10,684 (5.37)                           | 10,664 (5.36)      | 0                    |
| Dermatitis                                                             | 11,214 (6.76)             | 2,643 (6.55)       | 1                    | 13,539 (6.80)                           | 13,592 (6.83)      | 0                    |
| acute conjunctivitis                                                   | 9,371 (5.65)              | 2,260 (5.60)       | 0                    | 11,387 (5.72)                           | 11,404 (5.73)      | 0                    |
| Noninfective                                                           | 8,163 (4.92)              | 1,852 (4.59)       | 2                    | 9,827 (4.94)                            | 9,824 (4.93)       | 0                    |

|                                                                                                               |              |              |   |               |               |   |
|---------------------------------------------------------------------------------------------------------------|--------------|--------------|---|---------------|---------------|---|
| gastroenteritis and<br>colitis, unspecified                                                                   |              |              |   |               |               |   |
| Conjunctivitis,<br>unspecified                                                                                | 8,917 (5.37) | 2,232 (5.54) | 1 | 10,905 (5.48) | 10,953 (5.50) | 0 |
| Omphalitis of<br>newborn with or<br>without mild<br>haemorrhage                                               | 9,396 (5.66) | 2,226 (5.52) | 1 | 11,454 (5.76) | 11,468 (5.76) | 0 |
| Pneumonia,<br>unspecified                                                                                     | 3,328 (2.01) | 922 (2.29)   | 2 | 4,183 (2.10)  | 4,179 (2.10)  | 0 |
| Other and unspecified<br>asthma                                                                               | 5,500 (3.31) | 1,438 (3.57) | 1 | 6,814 (3.42)  | 6,806 (3.42)  | 0 |
| Acute suppurative<br>otitis media                                                                             | 5,888 (3.55) | 1,471 (3.65) | 1 | 7,160 (3.60)  | 7,186 (3.61)  | 0 |
| Constipation                                                                                                  | 8,801 (5.30) | 2,011 (4.99) | 1 | 10,628 (5.34) | 10,597 (5.32) | 0 |
| Acute<br>laryngopharyngitis                                                                                   | 6,997 (4.22) | 1,730 (4.29) | 0 | 8,581 (4.31)  | 8,616 (4.33)  | 0 |
| Viral intestinal<br>infection, unspecified                                                                    | 6,416 (3.87) | 1,413 (3.50) | 2 | 7,715 (3.88)  | 7,745 (3.89)  | 0 |
| Acute tonsillitis,<br>unspecified                                                                             | 6,764 (4.08) | 1,738 (4.31) | 1 | 8,373 (4.21)  | 8,407 (4.22)  | 0 |
| Other acute upper<br>respiratory infections<br>of multiple sites                                              | 5,970 (3.60) | 1,456 (3.61) | 0 | 7,311 (3.67)  | 7,342 (3.69)  | 0 |
| Acute sinusitis,<br>unspecified                                                                               | 4,841 (2.92) | 1,177 (2.92) | 0 | 5,892 (2.96)  | 5,885 (2.96)  | 0 |
| Acute suppurative<br>otitis media without<br>spontaneous rupture<br>of ear drum, unilateral<br>or unspecified | 5,449 (3.28) | 1,403 (3.48) | 1 | 6,762 (3.40)  | 6,737 (3.38)  | 0 |
| Urinary tract<br>infection, site not<br>specified                                                             | 2,617 (1.58) | 644 (1.60)   | 0 | 3,206 (1.61)  | 3,206 (1.61)  | 0 |
| Other atopic<br>dermatitis                                                                                    | 4,720 (2.84) | 1,072 (2.66) | 1 | 5,562 (2.80)  | 5,499 (2.76)  | 0 |
| Functional intestinal<br>disorder, unspecified                                                                | 4,859 (2.93) | 1,123 (2.79) | 1 | 5,883 (2.96)  | 5,872 (2.95)  | 0 |
| Otitis media,<br>unilateral or<br>unspecified                                                                 | 4,859 (2.93) | 1,305 (3.24) | 2 | 6,094 (3.06)  | 6,119 (3.07)  | 0 |
| Acute sinusitis, not<br>specified as recurrent                                                                | 4,773 (2.88) | 1,296 (3.21) | 2 | 6,001 (3.02)  | 6,000 (3.01)  | 0 |

|                                                        |              |              |   |              |              |   |
|--------------------------------------------------------|--------------|--------------|---|--------------|--------------|---|
| Irritant contact dermatitis, unspecified cause         | 5,332 (3.21) | 1,289 (3.20) | 0 | 6,461 (3.25) | 6,477 (3.25) | 0 |
| Neonatal conjunctivitis and dacryocystitis             | 4,599 (2.77) | 1,078 (2.67) | 1 | 5,590 (2.81) | 5,655 (2.84) | 0 |
| Candidal stomatitis                                    | 3,481 (2.10) | 909 (2.25)   | 1 | 4,323 (2.17) | 4,297 (2.16) | 0 |
| Seborrhoeic infantile dermatitis                       | 4,723 (2.85) | 1,090 (2.70) | 1 | 5,682 (2.86) | 5,701 (2.86) | 0 |
| Other allergic rhinitis                                | 3,588 (2.16) | 985 (2.44)   | 2 | 4,507 (2.27) | 4,577 (2.30) | 0 |
| Gastro-oesophageal reflux disease without oesophagitis | 3,490 (2.10) | 800 (1.98)   | 1 | 4,219 (2.12) | 4,234 (2.13) | 1 |
| Unspecified acute lower respiratory infection          | 3,041 (1.83) | 771 (1.91)   | 1 | 3,751 (1.89) | 3,732 (1.87) | 0 |
| Seborrhoeic dermatitis                                 | 4,216 (2.54) | 1,061 (2.63) | 1 | 5,134 (2.58) | 5,173 (2.60) | 0 |
| Functional dyspepsia                                   | 3,612(2.18)  | 836 (2.07)   | 1 | 4,378 (2.20) | 4,355 (2.19) | 0 |
| Urticaria, unspecified                                 | 3,651 (2.20) | 897 (2.22)   | 0 | 4,455 (2.24) | 4,441 (2.23) | 0 |
| Nausea and vomiting                                    | 2,707 (1.63) | 599 (1.49)   | 1 | 3,255 (1.64) | 3,293 (1.65) | 0 |
| Acute laryngitis                                       | 2,812 (1.69) | 742 (1.84)   | 1 | 3,491 (1.75) | 3,527 (1.77) | 0 |
| Bronchopneumonia                                       | 1,393 (0.84) | 386 (0.96)   | 1 | 1,744 (0.88) | 1,742 (0.88) | 0 |
| Functional diarrhea                                    | 2,863 (1.73) | 690 (1.71)   | 0 | 3,502 (1.76) | 3,498 (1.76) | 0 |

<sup>a</sup> Assessed from the date of birth to the index date, unless otherwise specified. <sup>b</sup> Inverse probability of treatment weighting on the propensity score was used to balance comparison groups on baseline health. Covariates for weighting were selected *a priori* (Table 1, Supplementary Table 3-6). Individuals of the reference group were weighted with stabilized weights, which allowed producing a sample with the same distribution of the covariates as the exposed group. <sup>c</sup> Values are reported as No. (%) unless otherwise indicated. <sup>d</sup> The difference between the groups divided by the pooled standard deviation; a value greater than 10% is interpreted as a meaningful difference.

**Supplement Table S5.** Hospitalization related Diagnosis in children with  $\geq 6$  hospitalization events.

|                                                                                      | Weighted Data (N =8,809) <sup>a</sup>                   |                          |
|--------------------------------------------------------------------------------------|---------------------------------------------------------|--------------------------|
|                                                                                      | Duration of Exclusive Breastfeeding, N (%) <sup>b</sup> |                          |
|                                                                                      | 4-<7months (n=4,079)                                    | $\geq 7$ month (n=4,730) |
| Pneumonia                                                                            | 2,046 (50.16)                                           | 2441 (51.61)             |
| Acute bronchitis, unspecified                                                        | 1,320 (32.36)                                           | 1610 (34.04)             |
| Acute tonsillitis, unspecified                                                       | 1,280 (31.38)                                           | 1466 (30.99)             |
| Influenza with other respiratory manifestations, seasonal influenza virus identified | 987 (24.20)                                             | 1256 (26.55)             |
| Other and unspecified gastroenteritis and colitis of infectious origin               | 904 (22.16)                                             | 1049 (22.18)             |
| Bronchopneumonia,                                                                    | 801 (19.64)                                             | 990 (20.93)              |
| Gastroenteritis and colitis of unspecified origin                                    | 791 (19.39)                                             | 930 (19.66)              |
| Pneumonia due to Mycoplasma pneumoniae                                               | 737 (18.07)                                             | 902 (19.07)              |
| Influenza with other respiratory manifestations, virus not identified                | 589 (14.44)                                             | 682 (14.42)              |
| Acute pharyngitis, unspecified                                                       | 534 (13.09)                                             | 659 (13.93)              |
| Acute bronchiolitis, unspecified                                                     | 357 (8.75)                                              | 416 (8.79)               |
| Enteroviral vesicular stomatitis with exanthema                                      | 280 (6.86)                                              | 384 (8.12)               |
| Asthma, unspecified                                                                  | 280 (6.86)                                              | 377 (7.97)               |
| Enteroviral vesicular pharyngitis                                                    | 283 (6.94)                                              | 328 (6.93)               |
| Fever, unspecified                                                                   | 279 (6.84)                                              | 327 (6.91)               |
| Viral intestinal infection, unspecified                                              | 232 (5.69)                                              | 283 (5.98)               |
| Acute obstructive laryngitis [croup]                                                 | 210 (5.15)                                              | 257 (5.43)               |
| Influenza due to identified zoonotic or pandemic influenza virus                     | 194 (4.76)                                              | 256 (5.41)               |
| Febrile convulsions                                                                  | 193 (4.73)                                              | 244 (5.16)               |
| Rotaviral enteritis                                                                  | 190 (4.66)                                              | 217 (4.59)               |

<sup>a</sup> Participants the weighted cohort with  $\geq 6$  all-cause hospitalization events after 24 months of age. <sup>b</sup> Results are reported as n (%) unless otherwise indicated.



## REFERENCE

1. Shin EJ, Kim Y, Jeong JY, Jung YM, Lee MH, Chung EH. The changes of prevalence and etiology of pediatric pneumonia from National Emergency Department Information System in Korea, between 2007 and 2014. *Korean J Pediatr.* 2018;61(9):291-300.
2. Lee SW, Yon DK, James CC, Lee S, Koh HY, Sheen YH, et al. Short-term effects of multiple outdoor environmental factors on risk of asthma exacerbations: Age-stratified time-series analysis. *J Allergy Clin Immunol.* 2019;144(6):1542-50 e1.
3. Shin SM, Shin JY, Kim MH, Lee SH, Choi S, Park BJ. Prevalence of antibiotic use for pediatric acute upper respiratory tract infections in Korea. *J Korean Med Sci.* 2015;30(5):617-24.
4. Ryoo E. Causes of acute gastroenteritis in Korean children between 2004 and 2019. *Clin Exp Pediatr.* 2021;64(6):260-8.
5. Ha EK, Lee SW, Kim JH, Shim S, Kim YH, Song JY, et al. Neurodevelopmental Outcomes in Infants Fed with Soy Formula: A Retrospective, National Population-Based Observational Cohort Study. *J Nutr.* 2021;151(10):3045-52.
